# Supplementary material for: Regio- and enantioselective microbial hydroxylation and evaluation of cytotoxic activity of β-cyclocitral-derived halolactones
Source: PLOS journal article supplement (doi:10.1371/journal.pone.0183429), 2017-08-24

Product 7

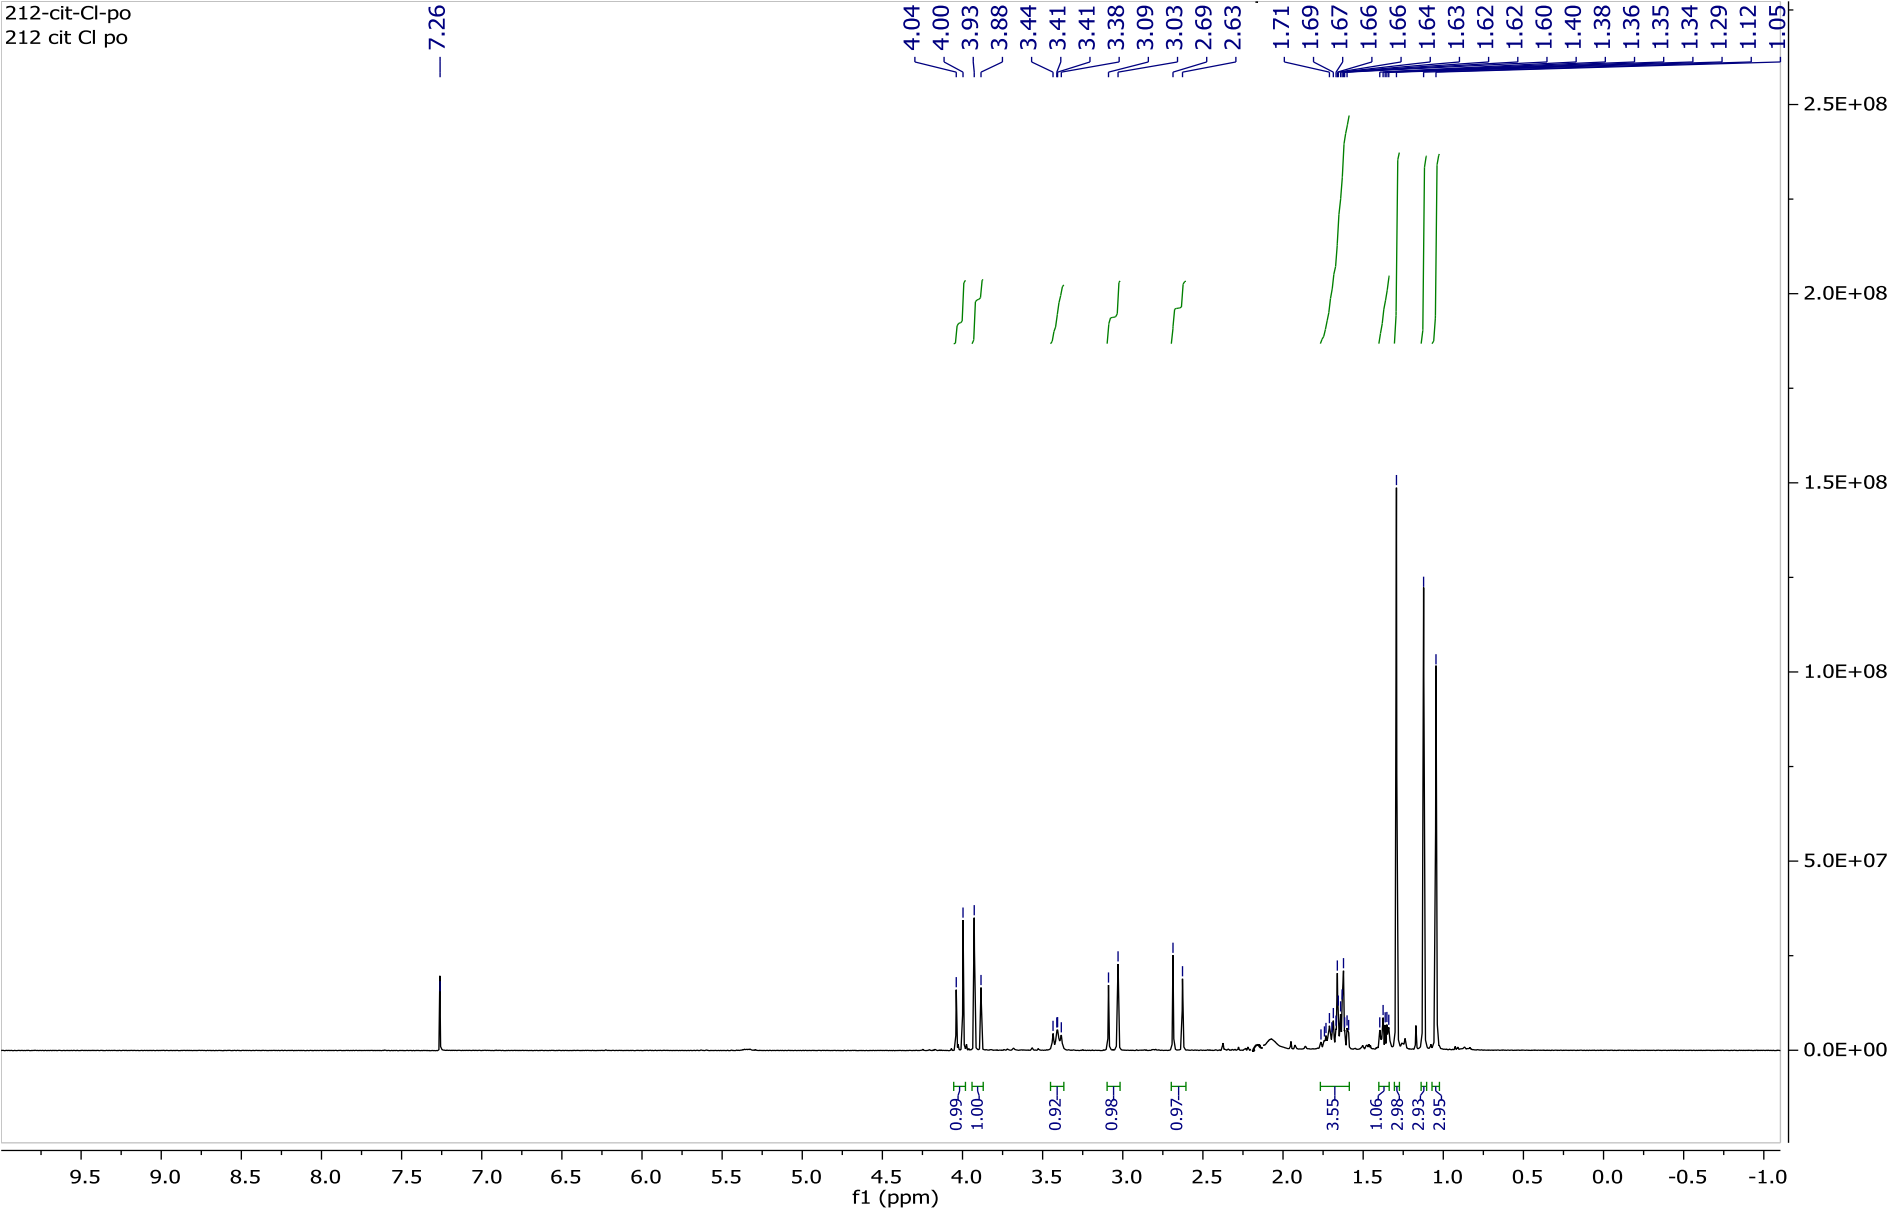

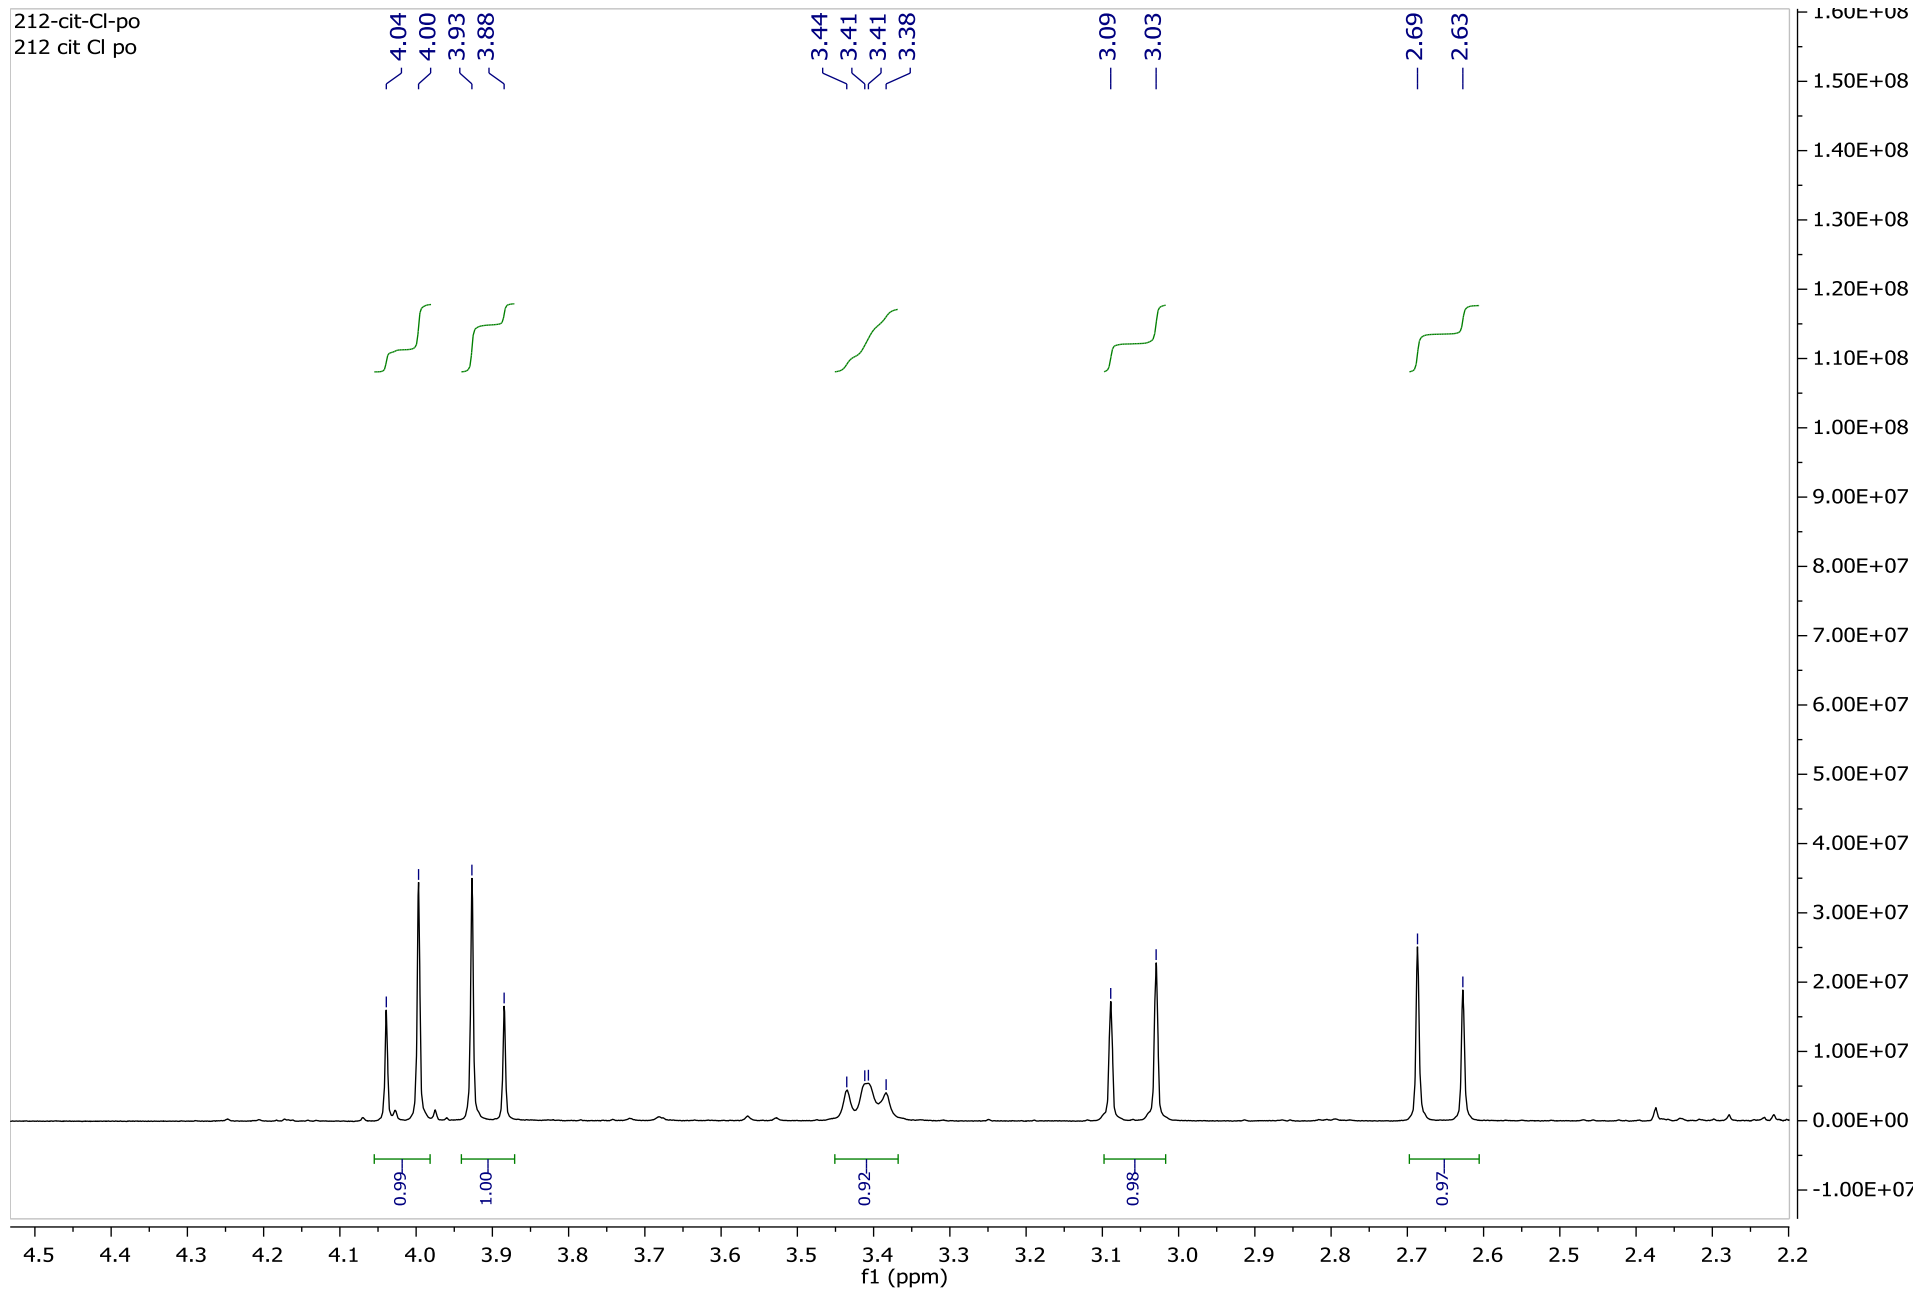

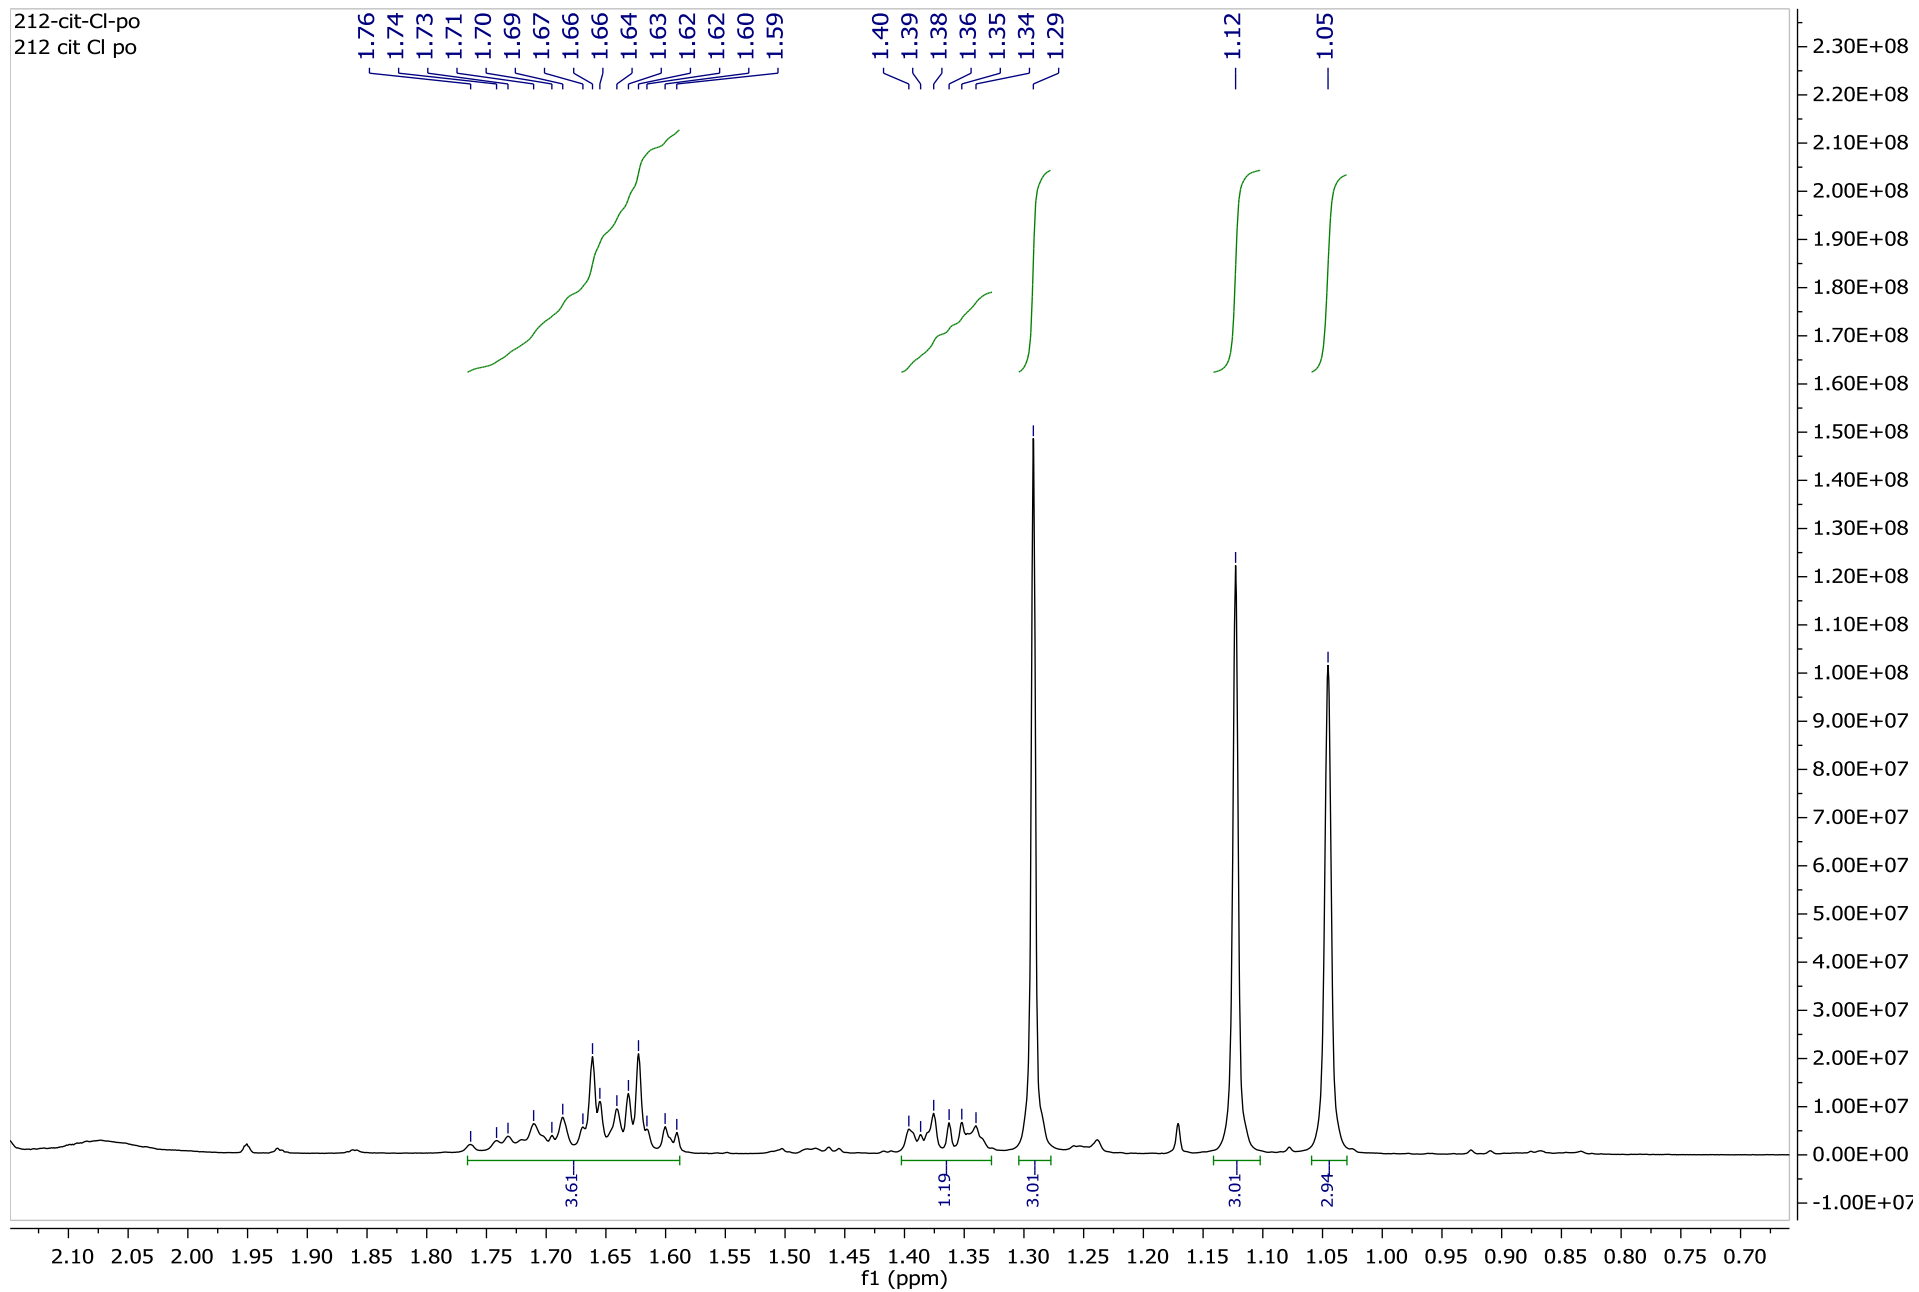

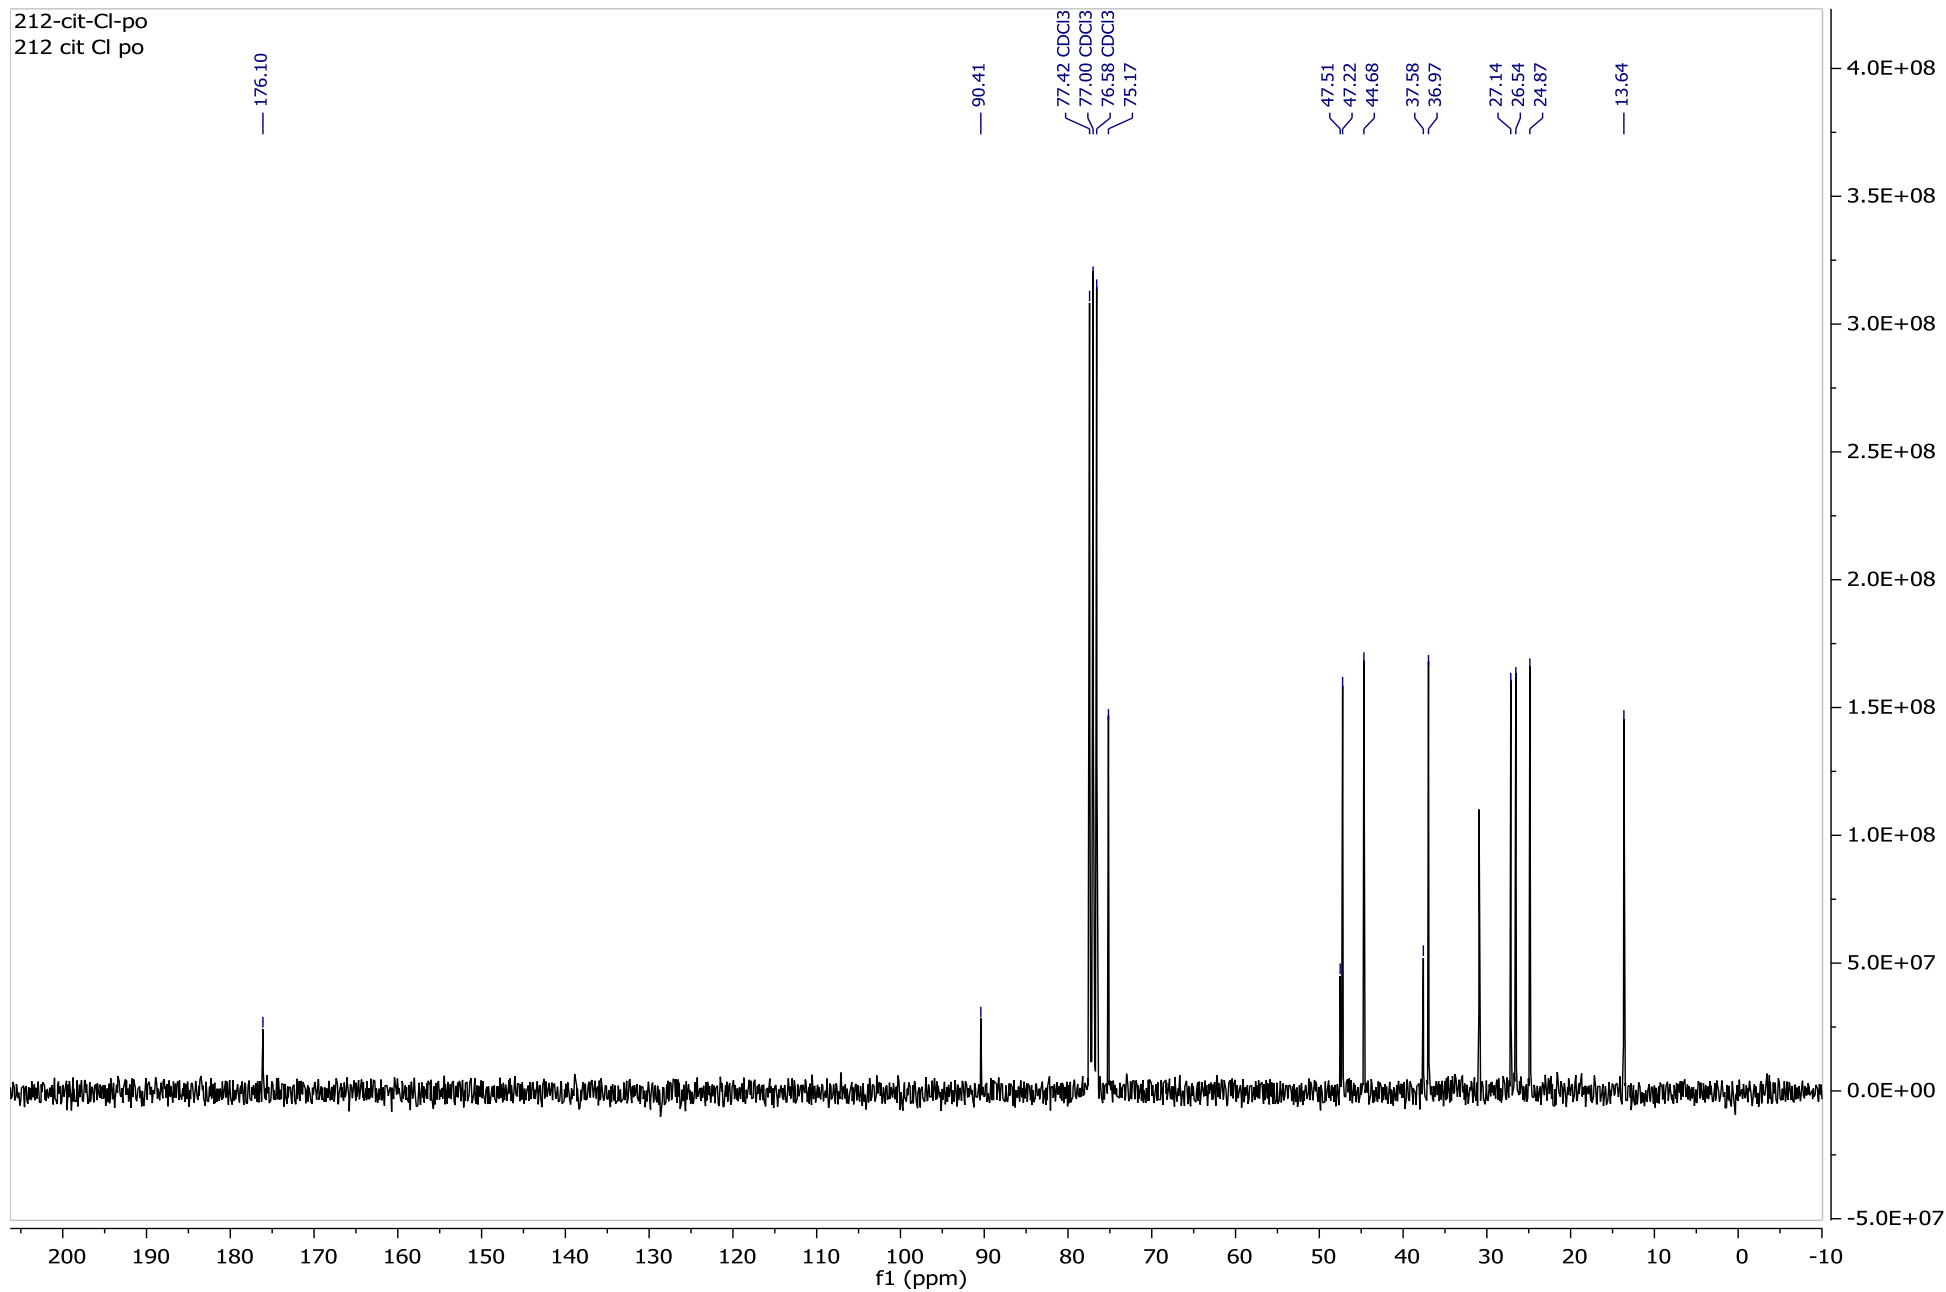

Supplement: S7 (10.1371/journal.pone.0183429.s007) [file journal.pone.0183429.s007]
